# Supplementary material for: Molecular–genetic and clinical characteristics of gliomas with astrocytic appearance and total 1p19q loss in a single institutional consecutive cohort
Source: PubMed Central journal article supplement (PMC4599243; doi:10.18632/oncotarget.3869), 2015-05-11
Supplement: oncotarget-06-15871-s001.pdf [file oncotarget-06-15871-s001.pdf]

**Molecular-genetic and clinical characteristics of gliomas with astrocytic appearance and total 1p19q loss in a single institutional consecutive cohort**

**Supplementary Material**

Table S1. Molecular and clinical characteristics of the 57 gliomas with total 1p19q loss.

| Case | Age Sex | Resec-tion | Dx | CNAs                              | IDH      | MGMT-MSP | P53 | ATRAX | OS   | Alive Dead |
|------|---------|------------|----|-----------------------------------|----------|----------|-----|-------|------|------------|
| 1    | 26F     | PR         | OD | -1p/19q                           | 1M       | M        | N/A | N/A   | 50≤  | Alive      |
| 2    | 35F     | STR        | OD | -1p/19q, -4, -13q21-22            | 1M       | U        | N/A | N/A   | 187  | Dead       |
| 3    | 47F     | STR        | OD | -1p/19q                           | 1M       | M        | N/A | N/A   | 129≤ | Alive      |
| 4    | 46M     | STR        | OD | -1p/19q                           | 1M       | M        | N/A | N/A   | 33≤  | Alive      |
| 5    | 23F     | Biopsy     | OD | -1p/19q, +19p                     | 1M       | U        | N/A | N/A   | 76≤  | Alive      |
| 6    | 53F     | GTR        | OD | -1p/19q, -14q22.3-ter, +17q22-ter | 1M       | N/A      | N/A | N/A   | 87≤  | Alive      |
| 7    | 40M     | Biopsy     | OD | -1p/19q, -18, +19p                | 1M       | M        | N/A | N/A   | 114≤ | Alive      |
| 8    | 40M     | GTR        | OD | -1p/19q, -13q                     | 1W       | M        | N/A | N/A   | 62≤  | Alive      |
| 9    | 53M     | Biopsy     | OD | -1p/19q                           | 1M       | M        | N/A | N/A   | 65≤  | Alive      |
| 10   | 39F     | STR        | OD | -1p/19q, -4, +11                  | 1M       | M        | N/A | N/A   | 87   | Dead       |
| 11   | 56M     | GTR        | OD | -1p/19q, -1q24-31                 | 1M       | M        | N/A | N/A   | 52≤  | Alive      |
| 12   | 30M     | STR        | OD | -1p/19q                           | 1M       | U        | N/A | N/A   | 64≤  | Alive      |
| 13   | 63M     | Biopsy     | OD | -1p/19q                           | 1M       | M        | N/A | N/A   | 36   | Dead       |
| 14   | 37F     | STR        | OD | -1p/19q, +1q, -3, -6, +9, +11     | 1M       | M        | N/A | N/A   | 62≤  | Alive      |
| 15   | 39M     | STR        | OD | -1p/19q                           | 1M       | M        | N/A | N/A   | 171≤ | Alive      |
| 16   | 53M     | STR        | OA | -1p/19q                           | 1M       | M        | N/A | N/A   | 129≤ | Alive      |
| 17   | 33F     | PR         | OA | -1p/19q                           | 1M       | U        | N/A | N/A   | 73≤  | Alive      |
| 18   | 34F     | GTR        | OA | -1p/19q, +7, +11, +17q,           | 1W<br>2M | M        | N/A | N/A   | 60≤  | Alive      |

|    |     |        |     |                                                                                                      |          |     |     |     |          |       |
|----|-----|--------|-----|------------------------------------------------------------------------------------------------------|----------|-----|-----|-----|----------|-------|
|    |     |        |     | -18q                                                                                                 |          |     |     |     |          |       |
| 19 | 32F | GTR    | OA  | -1p/19q,<br>-4, -18q                                                                                 | 1W<br>2M | M   | N/A | N/A | 105<br>≤ | Alive |
| 20 | 27F | PR     | OA  | -1p/19q                                                                                              | 1M       | U   | N/A | N/A | 87≤      | Alive |
| 21 | 50M | Biopsy | OA  | -1p/19q,<br>-4,<br>-9pter-2<br>1,<br>-13q21-t<br>er                                                  | 1M       | M   | N/A | N/A | 89≤      | Alive |
| 22 | 59F | GTR    | OA  | -1p/19q,<br>-4q                                                                                      | 1W<br>2M | M   | N/A | N/A | 100<br>≤ | Alive |
| 23 | 31M | STR    | OA  | -1p/19q                                                                                              | 1M       | M   | N/A | N/A | 143<br>≤ | Alive |
| 24 | 23M | PR     | OA  | -1p/19q,<br>-4p15.3-<br>15.1, -X                                                                     | 1M       | N/A | N/A | N/A | 151      | Dead  |
| 25 | 36F | STR    | AOD | -1p/19q,<br>+11,<br>-15q,<br>-18q                                                                    | 1M       | M   | N/A | N/A | 4≤       | Alive |
| 26 | 46F | PR     | AOD | -1p/19q,<br>-6pter-2<br>2,<br>-13q21-3<br>1,<br>-14q23-t<br>er                                       | 1M       | M   | N/A | N/A | 171<br>≤ | Alive |
| 27 | 63M | Biopsy | AOD | -1p/19q,<br>-4,<br>-14q21-2<br>4                                                                     | 1M       | M   | N/A | N/A | 49       | Dead  |
| 28 | 64M | STR    | AOD | -1p/19q,<br>-4, +11,<br>+17q,<br>-18                                                                 | 1M       | M   | N/A | N/A | 50≤      | Alive |
| 29 | 50M | Biopsy | AOD | -1p/19q,<br>-4, +7,<br>+8, +11                                                                       | 1M       | U   | N/A | N/A | 238      | Dead  |
| 30 | 36M | PR     | AOD | -1p/19q,<br>-4q28-31<br>.3, +9q,<br>+13q,<br>+14qcen<br>-23,<br>-15q21.3<br>-24.1,<br>+15q26,<br>-18 | 1M       | M   | N/A | N/A | 293      | Dead  |

|    |     |        |     |                                                                       |     |     |     |     |      |       |
|----|-----|--------|-----|-----------------------------------------------------------------------|-----|-----|-----|-----|------|-------|
| 31 | 52M | GTR    | AOD | -1p/19q,<br>-14q21-24                                                 | 1M  | M   | N/A | N/A | 51≤  | Alive |
| 32 | 22F | Biopsy | AOD | -1p/19q,<br>-14q,<br>+19p                                             | 1M  | N/A | N/A | N/A | 86   | Dead  |
| 33 | 37F | STR    | AOD | -1p/19q,<br>-14q,<br>+19p                                             | 1M  | N/A | N/A | N/A | 77   | Dead  |
| 34 | 38M | STR    | AOA | -1p/19q,<br>-13q                                                      | 1M  | N/A | N/A | N/A | 110≤ | Alive |
| 35 | 38M | STR    | AOA | -1p/19q,<br>-4p15.31-<br>qter,<br>+7q31-ter,<br>+8q21.2-<br>ter, -18q | N/A | M   | N/A | N/A | 90   | Dead  |
| 36 | 41M | STR    | AOA | -1p/19q,<br>+17                                                       | 1M  | M   | N/A | N/A | 39≤  | Alive |
| 37 | 53M | Biopsy | AOA | -1p/19q,<br>-14q,<br>+22q                                             | 1W  | U   | N/A | N/A | 86≤  | Alive |
| 38 | 40F | Biopsy | DA  | -1p/19q                                                               | 1M  | M   | Neg | Pos | 20≤  | Alive |
| 39 | 37F | STR    | DA  | -1p/19q                                                               | 1M  | M   | Neg | Pos | 75≤  | Alive |
| 40 | 51M | PR     | DA  | -1p/19q                                                               | N/A | M   | Neg | Pos | 95   | Dead  |
| 41 | 60M | Biopsy | DA  | -1p/19q,<br>-15q, -X                                                  | 1M  | M   | Neg | Pos | 143≤ | Alive |
| 42 | 52M | Biopsy | DA  | -1p/19q,<br>-14q21.3-<br>ter                                          | 1M  | N/A | Neg | Neg | 213≤ | Alive |
| 43 | 62F | STR    | DA  | -1p/19q,<br>-4, +7,<br>+11q,<br>-15q,<br>-18q                         | 1M  | M   | Neg | Pos | 96≤  | Alive |
| 44 | 28F | GTR    | DA  | -1p/19q,<br>-3p24-22,<br>+7q                                          | N/A | M   | Neg | Pos | 239≤ | Alive |
| 45 | 27M | PR     | AA  | -1p/19q,<br>+11                                                       | 1M  | M   | Neg | Pos | 184  | Dead  |
| 46 | 57M | Biopsy | AA  | -1p/19q,<br>-4                                                        | 1M  | M   | N/A | N/A | 103≤ | Alive |
| 47 | 63F | Biopsy | AA  | -1p/19q,<br>+1q,<br>+4qcen-<br>28,<br>-4q31.2-t                       | 1M  | M   | Neg | Pos | 12   | Dead  |

|    |     |        |     |                                                                                             |          |   |     |     |          |       |
|----|-----|--------|-----|---------------------------------------------------------------------------------------------|----------|---|-----|-----|----------|-------|
|    |     |        |     | er, -6q,<br>+7, +9,<br>-10,<br>-13qcen-<br>21, -14q,<br>-17p12-c<br>en                      |          |   |     |     |          |       |
| 48 | 52M | STR    | AA  | -1p/19q,<br>+3q26.2-<br>ter,<br>-9pter-q<br>33,+17,<br>-18q21.2<br>-22.1,<br>+19p           | 1M       | M | Neg | Neg | 38       | Dead  |
| 49 | 42M | PR     | AA  | -1p/19q,<br>-6pter-2<br>1.32, +8,<br>+9q34,<br>+11q23-t<br>er,<br>+17q21.<br>3-ter,<br>+19p | 1M       | M | Neg | Pos | 55≤      | Alive |
| 50 | 37M | STR    | AA  | -1p/19q,<br>+7q,<br>-9p21.3,<br>+19p                                                        | N/A      | M | Neg | Pos | 94       | Dead  |
| 51 | 44M | STR    | AA  | -1p/19q,<br>+7, -10p                                                                        | 1M       | M | Neg | Pos | 176      | Dead  |
| 52 | 27F | STR    | AA  | -1p/19q                                                                                     | 1W<br>2M | M | Neg | Pos | 23≤      | Alive |
| 53 | 28M | STR    | AA  | -1p/19q,<br>+10, -18                                                                        | 1M       | M | Neg | Neg | 110<br>≤ | Alive |
| 54 | 39M | STR    | LGG | -1p/19q,<br>-4                                                                              | 1M       | M | N/A | N/A | 162      | Dead  |
| 55 | 31M | Biopsy | LGG | -1p/19q                                                                                     | 1M       | U | N/A | N/A | 62≤      | Alive |
| 56 | 40M | Biopsy | LGG | -1p/19q,<br>-19p                                                                            | 1M       | M | N/A | N/A | 61≤      | Alive |
| 57 | 54M | Biopsy | LGG | -1p/19q                                                                                     | 1M       | M | N/A | N/A | 60≤      | Alive |

CNAs: chromosome copy number aberrations, PR: partial removal, STR: subtotal removal, GTR: gross total removal, Dx: institutional diagnosis, OD: oligodendroglioma, AOD: anaplastic oligodendroglioma, OA: oligoastrocytoma, DA: diffuse astrocytoma, AA: anaplastic astrocytoma, LGG: unclassified low grade glioma, IDH M: mutated, IDH W: wild-type, MGMT-MSP: methylation-specific PCR of the *MGMT* gene, MSP M: methylated, MSP U: unmethylated, Pos: positive, Neg: negative, OS: overall survival (months)
